# Supplementary material
Source: PubMed Central journal article supplement (PMC6166676)
Supplement: 134067_1_supp_140300_p8w6kl.pdf [file 134067_1_supp_140300_p8w6kl.pdf]

## Supplementary Tables

**Table S1.** The code for this analysis is available at <https://bitbucket.org/evertbosdriesz/cgc-multi-omics>, in the notebook src/R/combined-pca.Rmd

| Sheet | Description                                                                                   |
|-------|-----------------------------------------------------------------------------------------------|
| RNA   | It contains PCA loading and log <sub>2</sub> -fold-changes of mRNA compared to T=0 h.         |
| PROT  | It contains PCA loading and log <sub>2</sub> -fold-changes of proteins compared to T=0 h.     |
| PHOS  | It contains PCA loading and log <sub>2</sub> -fold-changes of phosphosites compared to T=0 h. |

**Table S2.** It contains differential mRNA expression analysis and pathways analysis in **BRAF(V600E) CRC cell lines**. The code for this analysis is available at <https://bitbucket.org/evertbosdriesz/cgc-multi-omics>, in the notebook src/R/validation/dge-vaco-snuc5-km20.Rmd

| Sheet               | Description                                                                                                                                                                                                                                                        |
|---------------------|--------------------------------------------------------------------------------------------------------------------------------------------------------------------------------------------------------------------------------------------------------------------|
| BRAFiEGFRi_CTRL     | Differential expression analysis of BRAFi+EGFRi compared to Control for SNU-C5, VACO432 KM-20.                                                                                                                                                                     |
| BRAFi_CTRL          | Differential expression analysis of BRAFi compared to Control for SNU-C5, VACO432 KM-20.                                                                                                                                                                           |
| pathways_BRAFiEGFRi | Mean log <sub>2</sub> -fold-changes of mRNAs per geneset which are significantly enriched amongst the upregulated proteins upon BRAFi+EGFRi in the WiDr cell line. The p-value indicates if the mean log <sub>2</sub> -fold-change is significantly larger than 0. |
| pathways_BRAFi      | Mean log <sub>2</sub> -fold-changes of mRNAs per geneset which are significantly enriched amongst the upregulated proteins upon BRAFi in the WiDr cell line. The p-value indicates if the mean log <sub>2</sub> -fold-changes is significantly larger than 0.      |

**Table S3. Differential mRNA and protein expression between PTPN11 WT and PTPN11 KO.** The code for this analysis is available at <https://bitbucket.org/evertbosdriesz/cgc-multi-omics>, in the notebook src/R/ptpn11-proteins-down.Rmd

| Sheet                  | Description                                                                                                                                                                                                                                                                                                                                                                                           |
|------------------------|-------------------------------------------------------------------------------------------------------------------------------------------------------------------------------------------------------------------------------------------------------------------------------------------------------------------------------------------------------------------------------------------------------|
| RNA                    | Differential expression results of PTPN11 WT vs KO of all transcripts                                                                                                                                                                                                                                                                                                                                 |
| PROT                   | Differential expression results of PTPN11 WT vs KO of all proteins                                                                                                                                                                                                                                                                                                                                    |
| prot-ptpn11-down       | Results of the differential expression analysis of proteins and mRNAs when comparing PTPN11 KO to PTPN11 WT cells, while correcting for time-point and treatment. P-values were adjusted for multiple testing using the Benjamini-Hochberg procedure.                                                                                                                                                 |
| enrichment-ptpn11-down | Results of enrichment analysis of selected genes using the MSigDB Hallmark gene sets. Enrichment analysis was done using the Fisher-exact test with all genes measured on both protein and mRNA level as population. Genes were selected based on being strongly downregulated on the protein but not mRNA level. P-values were adjusted for multiple testing using the Benjamini-Hochberg procedure. |

**Table S4. Full clustering and enrichment results from correlation clustering.**

The code for this analysis is available at <https://bitbucket.org/evertbosdriesz/cgc-multi-omics>, in the notebook src/R/correlation-clustering.Rmd.

| Sheet              | Description                                                                                                            |
|--------------------|------------------------------------------------------------------------------------------------------------------------|
| PHOSPHO_CLUSTERS   | List of clusters assigned to phosphosites.                                                                             |
| PHOSPHO_ENRICHMENT | Enrichment of kinase-substrates in the phosphoproteomic clusters. Genesets are all (predicted) substrates of a kinase. |

|                           |                                                                                                                                                                                                        |
|---------------------------|--------------------------------------------------------------------------------------------------------------------------------------------------------------------------------------------------------|
| PROT_CLUSTERS             | List of clusters assigned to proteins.                                                                                                                                                                 |
| PROT_ENRICHMENT           | Enrichment of transcription factor-target gene in the proteomics clusters. Genesets are all target genes of a transcription factor. This sheet is empty because there were no significant enrichments. |
| PROT_ENRICHMENT_HALLMARKS | Enrichment of the MSigDB Hallmark genesets in the proteomics clusters.                                                                                                                                 |
| RNA_CLUSTERS              | List of clusters assigned to transcripts.                                                                                                                                                              |
| RNA_ENRICHMENT            | Enrichment of transcription factor-target gene in the transcriptomics clusters. Genesets are all target genes of a transcription factor.                                                               |
| RNA_ENRICHMENT_HALLMARKS  | Enrichment of the MSigDB Hallmark genesets in the transcriptomics clusters.                                                                                                                            |

**Table S5. Differential mRNA and protein expression between BRAF<sup>i</sup> and Control WiDr cells after 48 h.** The code for this analysis is available at <https://bitbucket.org/evertbosdriesz/cgc-multi-omics>, in the notebook src/R/enrichment-p-ctr.Rmd.

| Sheet              | Description                                                                                                                                                                                         |
|--------------------|-----------------------------------------------------------------------------------------------------------------------------------------------------------------------------------------------------|
| PROT               | Differential expression analysis of proteins.                                                                                                                                                       |
| RNA                | Differential expression analysis of transcripts.                                                                                                                                                    |
| ENRICHMENT_PROT_UP | Enrichment analysis of proteins differentially expressed based p-value (FDR < 0.05) and effect size (log <sub>2</sub> -fold-changes > 0) by using the MSigDB Hallmark, KEGG, and Reactome genesets. |

|                      |                                                                                                                                                                                                                                                                    |
|----------------------|--------------------------------------------------------------------------------------------------------------------------------------------------------------------------------------------------------------------------------------------------------------------|
| ENRICHMENT_PROT_DOWN | Enrichment analysis of proteins differentially expressed based p-value (FDR < 0.05) and effect size ( $\log_2$ -fold-changes < 0) by using the MSigDB Hallmark, KEGG, and Reactome genesets.                                                                       |
| ENRICHMENT_RNA_UP    | Enrichment analysis of transcripts differentially expressed based p-value (FDR < 0.05) and effect size ( $\log_2$ -fold-changes > 0) by using the MSigDB Hallmark, KEGG, and Reactome genesets. This sheet is empty because there were no significant enrichments. |
| ENRICHMENT_RNA_DOWN  | Enrichment analysis of transcripts differentially expressed based p-value (FDR < 0.05) and effect size ( $\log_2$ -fold-changes < 0) by using the MSigDB Hallmark, KEGG, and Reactome genesets.                                                                    |
| PROT_GENESET_RNA     | Mean $\log_2$ -fold-changes of mRNAs per geneset which are significantly enriched amongst the upregulated proteins. The p-value indicates if the mean $\log_2$ -fold-changes is significantly larger than 0.                                                       |

**Table S6. Differential mRNA and protein expression between BRAF<sup>i</sup>+EGFR<sup>i</sup> and Control cells after 48 h.** The code for this analysis is available at <https://bitbucket.org/evertbosdriesz/cgc-multi-omics>, in the notebook src/R/enrichment-pg-ctr.Rmd.

| Sheet | Description                                     |
|-------|-------------------------------------------------|
| PROT  | Differential expression analysis of proteins    |
| RNA   | Differential expression analysis of transcripts |

|                      |                                                                                                                                                                                                                                                                    |
|----------------------|--------------------------------------------------------------------------------------------------------------------------------------------------------------------------------------------------------------------------------------------------------------------|
| ENRICHMENT_PROT_UP   | Enrichment analysis of proteins differentially expressed based p-value (FDR < 0.05) and effect size ( $\log_2$ -fold-changes > 0) by using the MSigDB Hallmark, KEGG, and Reactome genesets.                                                                       |
| ENRICHMENT_PROT_DOWN | Enrichment analysis of proteins differentially expressed based p-value (FDR < 0.05) and effect size ( $\log_2$ -fold-changes < 0) by using the MSigDB Hallmark, KEGG, and Reactome genesets.                                                                       |
| ENRICHMENT_RNA_UP    | Enrichment analysis of transcripts differentially expressed based p-value (FDR < 0.05) and effect size ( $\log_2$ -fold-changes > 0) by using the MSigDB Hallmark, KEGG, and Reactome genesets. This sheet is empty because there were no significant enrichments. |
| ENRICHMENT_RNA_DOWN  | Enrichment analysis of transcripts differentially expressed based p-value (FDR < 0.05) and effect size ( $\log_2$ -fold-changes < 0) by using the MSigDB Hallmark, KEGG, and Reactome genesets.                                                                    |
| PROT_GENESET_RNA     | Mean $\log_2$ -fold-changes of mRNAs per geneset which are significantly enriched amongst the upregulated proteins. The p-value indicates if the mean $\log_2$ -fold-changes is significantly larger than 0.                                                       |

**Table S7. proteinGroups.** The table contains the list of identified and quantified proteins by MaxQuant using the integrated Andromeda search engine, and a mutant-modified Homo sapiens Swiss-Prot database for the (phospho)protein database search. Each protein is

provided with the accession code, the number of unique peptides assigned, the percentage sequence coverage and the quantification value.

**Table S8. Phospho (STY)Sites.** The table contains the list of identified and quantified phosphosites by MaxQuant using the integrated Andromeda search engine, and a mutant-modified Homo sapiens Swiss-Prot database for the (phospho)protein database search. Each phosphosite is provided with the position, the accession code, the localization probability calculated with PEP, peptide sequence window containing the phosphorylation, and the quantification value.

**Table S9. modificationSpecificPeptides.** The table contains the list of modified peptides identified by MaxQuant using the integrated Andromeda search engine, and a mutant-modified Homo sapiens Swiss-Prot database for the (phospho)protein database search. Each peptide is provided with the modification type, the accession code, the number of modifications, the mass value, and the quantification value.
